# Supplementary material for: Image-Based Single Cell Profiling: High-Throughput Processing of Mother Machine Experiments
Source: PLOS journal article supplement (doi:10.1371/journal.pone.0163453), 2016-09-23
Supplement: S1 (10.1371/journal.pone.0163453.s001) [file journal.pone.0163453.s001]

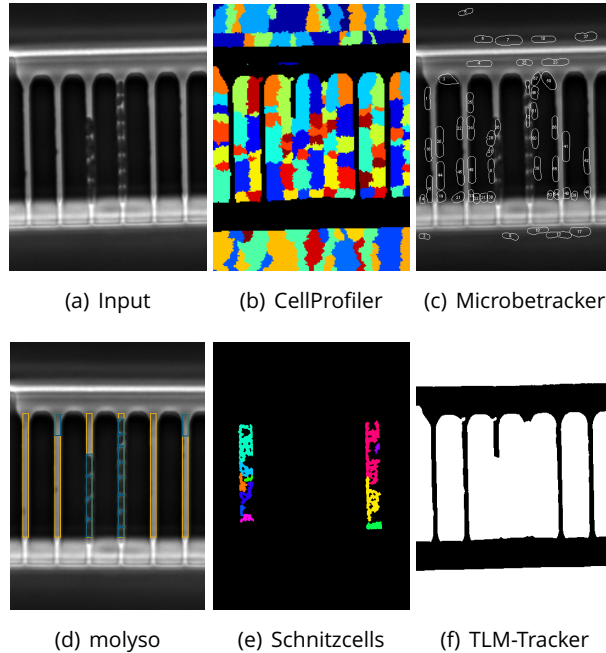

**Supplementary Figure 1** (a): input image sample used for test segmentations. All tools are executed with standard parameters, results are shown in (b)-(f). (b): CellProfiler with the *IdentifyPrimaryObjects* function in mode *Auto*. The input was inverted before analysis. (c): Microbetracker; multiple configuration were found to yield similarly results. (d): molyso automatically rotates the input image. (e): Schnitzcells with the *e.coli* preset. (f): TLM-Tracker with the Chan-Vese active contours method as one example of multiple, similar performing segmentation techniques.
