# Supplementary material for: Image-Based Single Cell Profiling: High-Throughput Processing of Mother Machine Experiments
Source: PLOS journal article supplement (doi:10.1371/journal.pone.0163453), 2016-09-23
Supplement: S2 (10.1371/journal.pone.0163453.s002) [file journal.pone.0163453.s002]

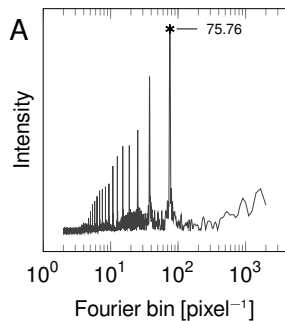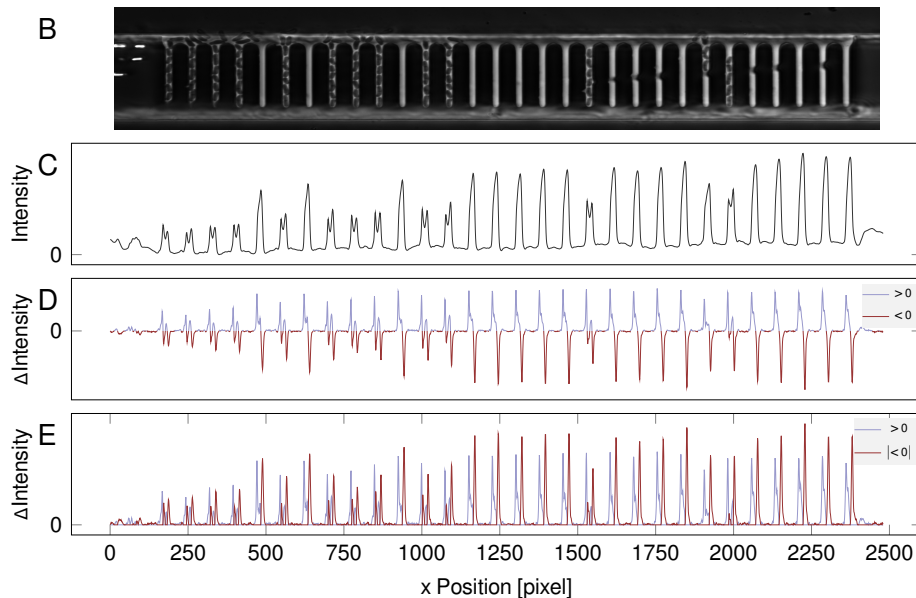

**Supplementary Figure 2** **A:** An example power (absolute) spectrum of one of signals in **E**: the channel interval becomes visible as maximum (denoted with \*). **B** is the rotated input image, used to calculate profile **C**, of which the discrete difference (*i.e.* the derivative) **D** is calculated. **C** can be split into positive and negative parts, which correspond to the left/right sides of the channels. **E** is the intermediate result used for further processing: the positive and (absolute) negative part (light blue/dark red) of the profile.
